# Supplementary material for: SCD6 induces ribonucleoprotein granule formation in trypanosomes in a translation-independent manner, regulated by its Lsm and RGG domains
Source: PubMed Central journal article supplement — Mol Biol Cell. 2013 Jul 1;24(13):2098–111. doi: 10.1091/mbc.E13-01-0068 (PMC3694794; doi:10.1091/mbc.e13-01-0068), 2013-07-01
Supplement: supp_E13-01-0068v1_CombinedSupMats.pdf [file supp_E13-01-0068v1_CombinedSupMats.pdf]

Krüger *et al.*

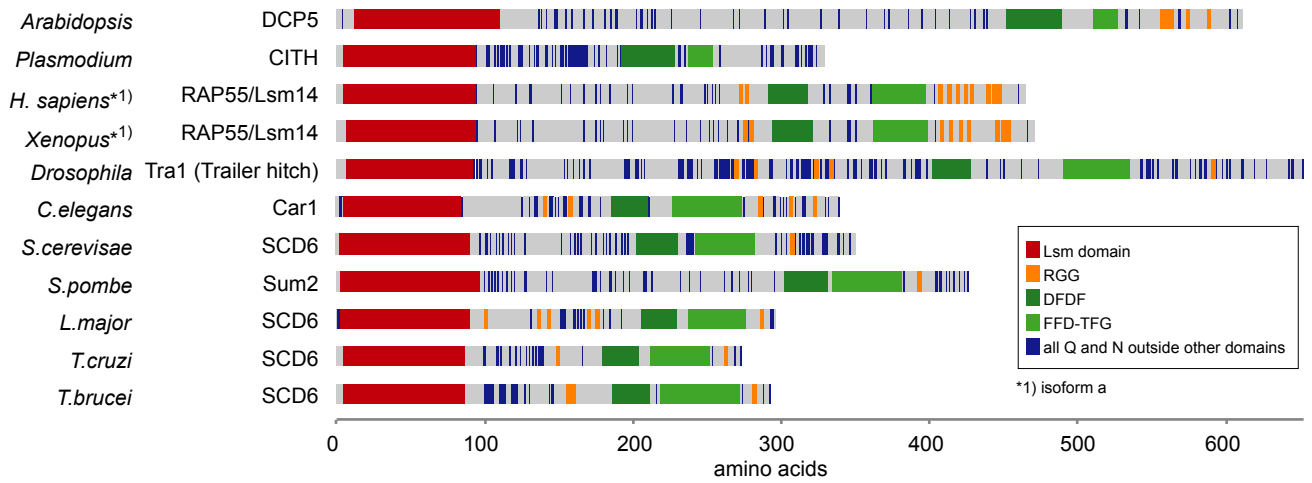

**Figure S1:** Schematics of orthologues to SCD6/RAP55 from various organisms. Domains, RGG motifs and Q or N residues outside of other domains are marked.

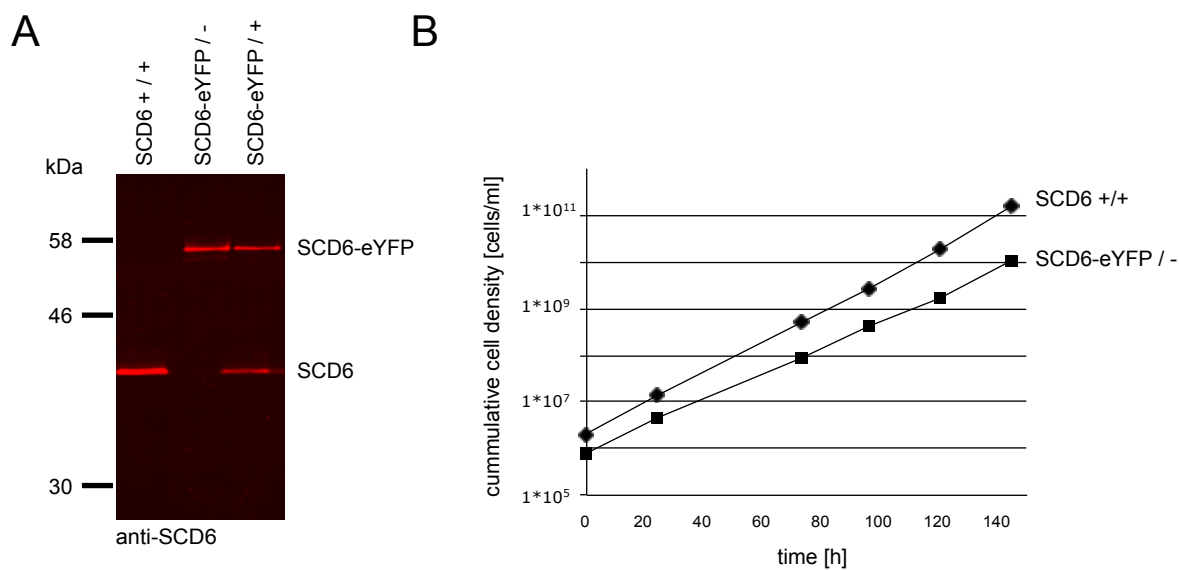

**Figure S2: SCD6-eYFP is functional**

A cell line was made that had one SCD6 allele replaced by a blasticidin resistance gene using 5' and 3' UTR sequences for homologous recombination. The second allele was endogenously tagged with a C-terminal eYFP tag, as described in Kelly et al., 2007. (A) Western blot with cell lysates of the cell lines SCD6 + / +, SCD6-eYFP / - and SCD6-eYFP / +. (B) Growth of the SCD6-eYFP / - cells in comparison to wild type cells (SCD6 + / +)

Kelly, S., Reed, J., Kramer, S., Ellis, L., Webb, H., Sunter, J., Salje, J., Marinsek, N., Gull, K., Wickstead, B. et al. (2007). Functional genomics in *Trypanosoma brucei*: a collection of vectors for the expression of tagged proteins from endogenous and ectopic gene loci. *Mol Biochem Parasitol* 154, 103-109.

A

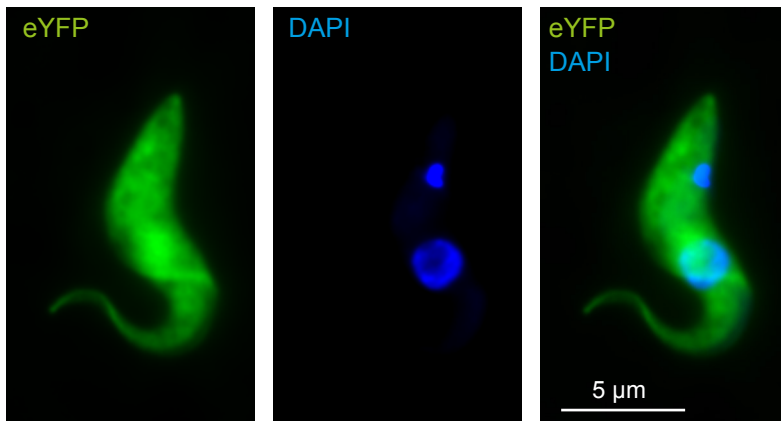

B

no expression of SCD6 (0 hours TET)

expression of SCD6 (24 hours TET)

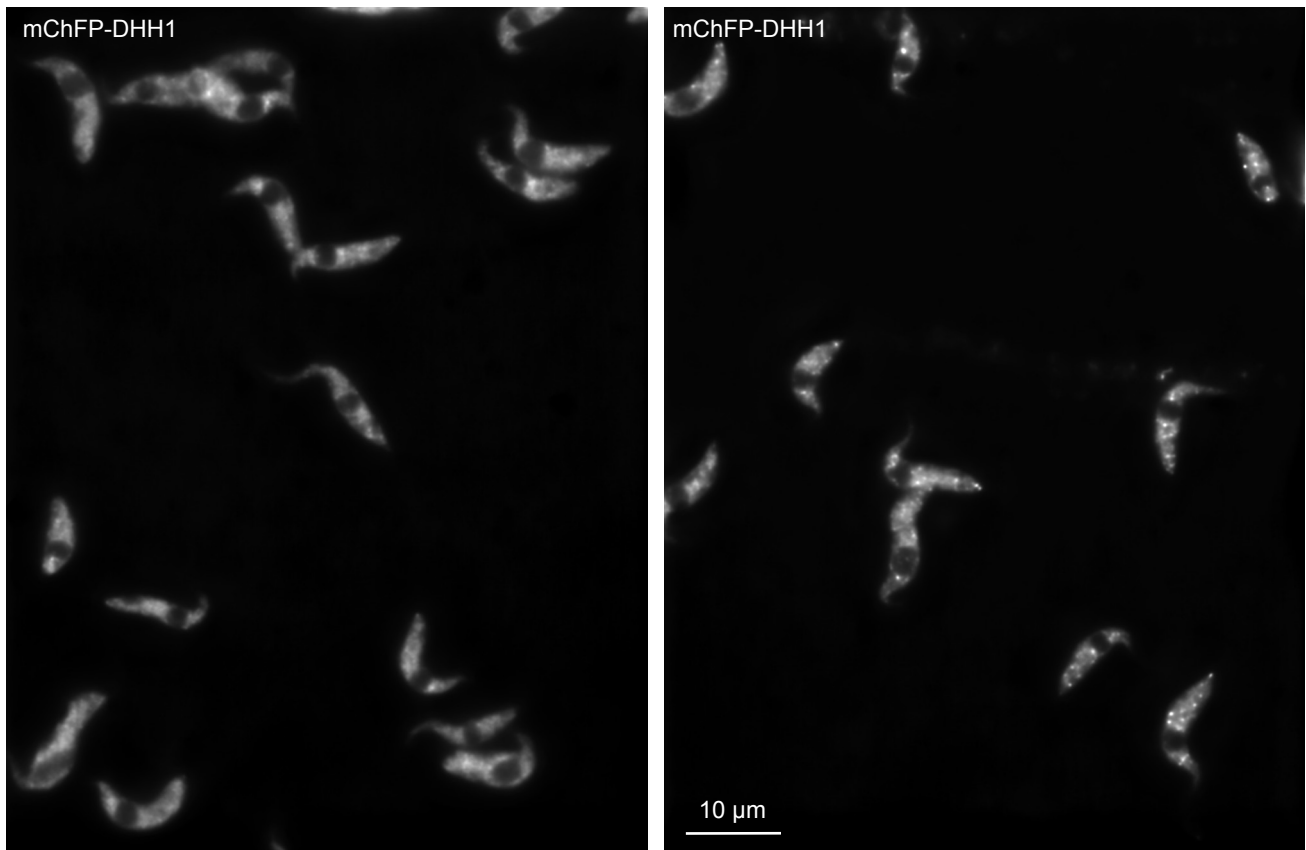**Figure S3:**

A) Inducible expression of eYFP in procyclic trypanosomes does not result in the formation of granules. The total fluorescence intensity of this particular cell was 349207 and therefore well above the threshold expression level required for granule formation at inducible SCD6-eYFP overexpression.

B) Inducible expression of SCD6 (without eYFP tag) causes recruitment of mChFP-DHH1 to granules in a similar way as does the expression of SCD6-eYFP.

## Figure S4

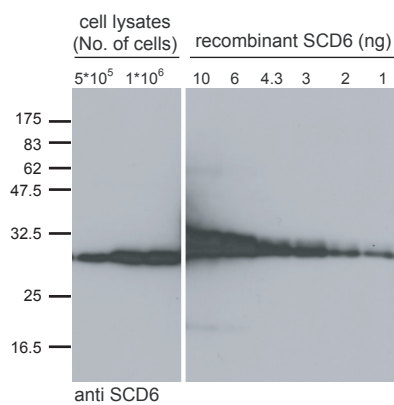

Figure S4:

A titration of recombinant SCD6 protein purified from *E. coli* was used to estimate the amount of SCD6 molecules in a procyclic trypanosome cell. There are about 3 ng in  $1 \times 10^6$  cells, equivalent to ~60,000 SCD6 molecules per cell.

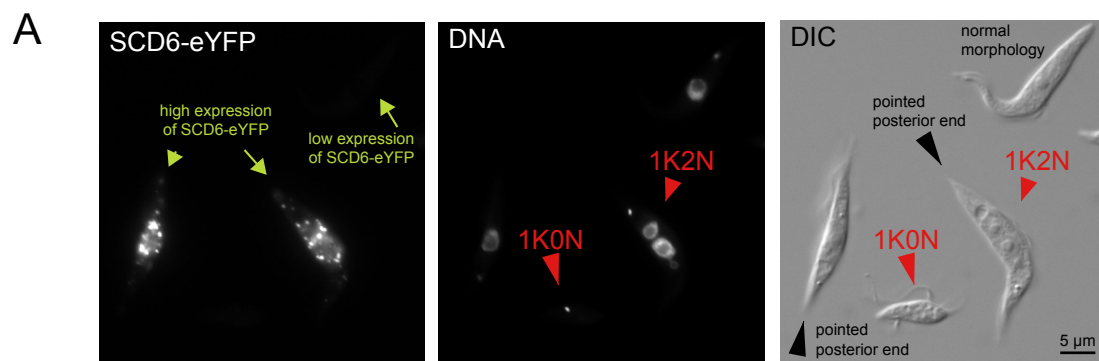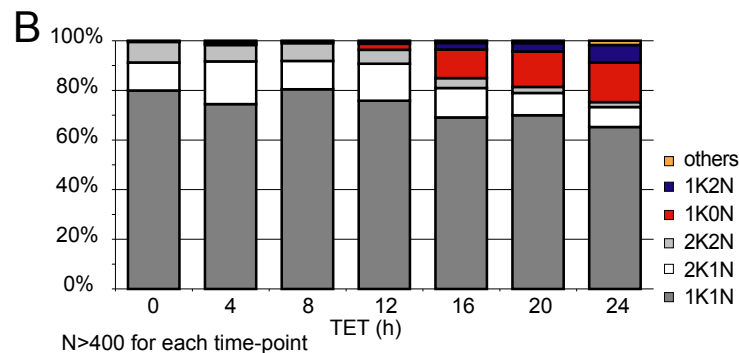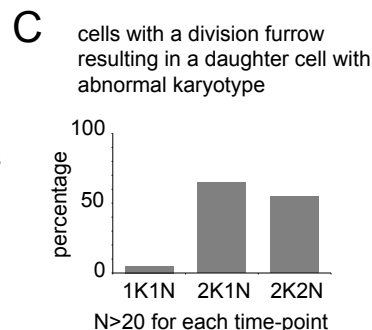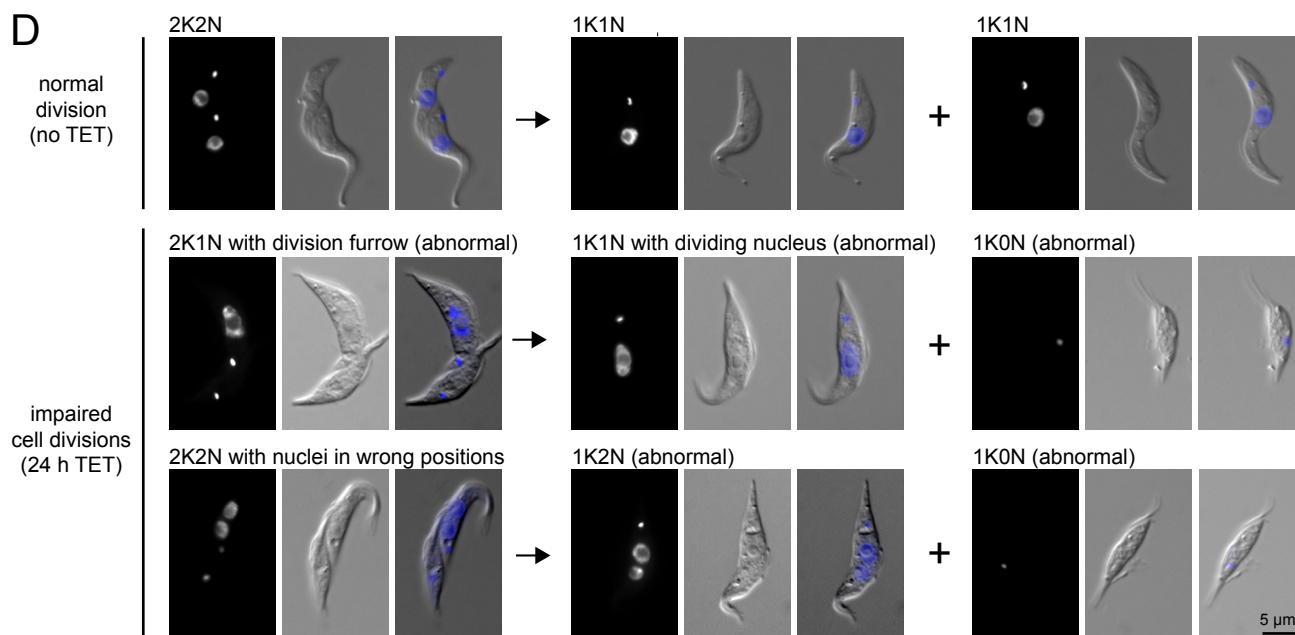

Figure S5: Over-expression of SCD6-eYFP results in a block in mitosis

Over-expression of SCD6-eYFP causes a change in cell morphology and an increase in cells with abnormal karyotypes. Cells become pointed at both ends (A) and an increasing number of cells has abnormal karyotypes (A and B). After mitosis, procyclic trypanosomes have one nucleus and one kinetoplast (1K1N), then first divide the kinetoplast (2K1N) and subsequently the nucleus (2K2N) that will move in between the two kinetoplasts to allow longitudinal cell division. On over-expression of SCD6-eYFP, abnormal 1K0N and 1K2N cells increased (A and B). In addition, the majority of cells with normal karyotypes were abnormal in size and shape of the nuclei and position/presence of the division furrow: 1K1N cells often had a large and bilobed nucleus and sometimes a division furrow; the majority of 2K1N cells had large nuclei and a division furrow in a position to produce a 1K0N cell as well as a 1K1N cells with a bilobed nucleus; many of the 2K2N were about to divide into a 1K2N and 1K0N cell and often nuclei did not become separated and appeared different in size. In fact, more than half of all 2K1N and 2K2N cells with a division furrow present had the division furrow wrongly positioned (C). Taken together, the data can be explained with untimed cell division prior to either the division of the nucleus or the correct positioning of the two daughter nuclei: 2K1N cells divide to a 1K0N cell and a 1K1N cell with a dividing nucleus and 2K2N cells give rise to 1K0N and 1K2N cells (D).

(A) Typical fluorescent microscopy image (single plane) at 24 hours tetracyclin induction showing two cells with high SCD6-eYFP expression (including one with the abnormal 1K2N karyotype), one cell with low SCD6-eYFP expression and one 1K0N cell. Black arrows in the DIC image point to the spindle-shaped cell poles that are absent in the cell with low expression level. (B) Karyotype analysis over a time-course of induction of SCD6-eYFP over-expression. Normal karyotypes are shown in three different shades of grey, abnormal karyotypes in colour. (C) Percentage of cells with normal karyotypes that had a division furrow resulting in daughter cells with abnormal karyotypes. The analysis was done after 24 hours induction with tetracyclin. (D) Two models of an asymmetric cell division caused by SCD6-eYFP overexpression that are in agreement with the data. A normal cell division is shown on top. All images were taken using a Zeiss Axioskop microscope equipped with a Plan-Apochromat 100x/1.4 Oil DIC objective and a monochrome CCD camera AxioCam MR.

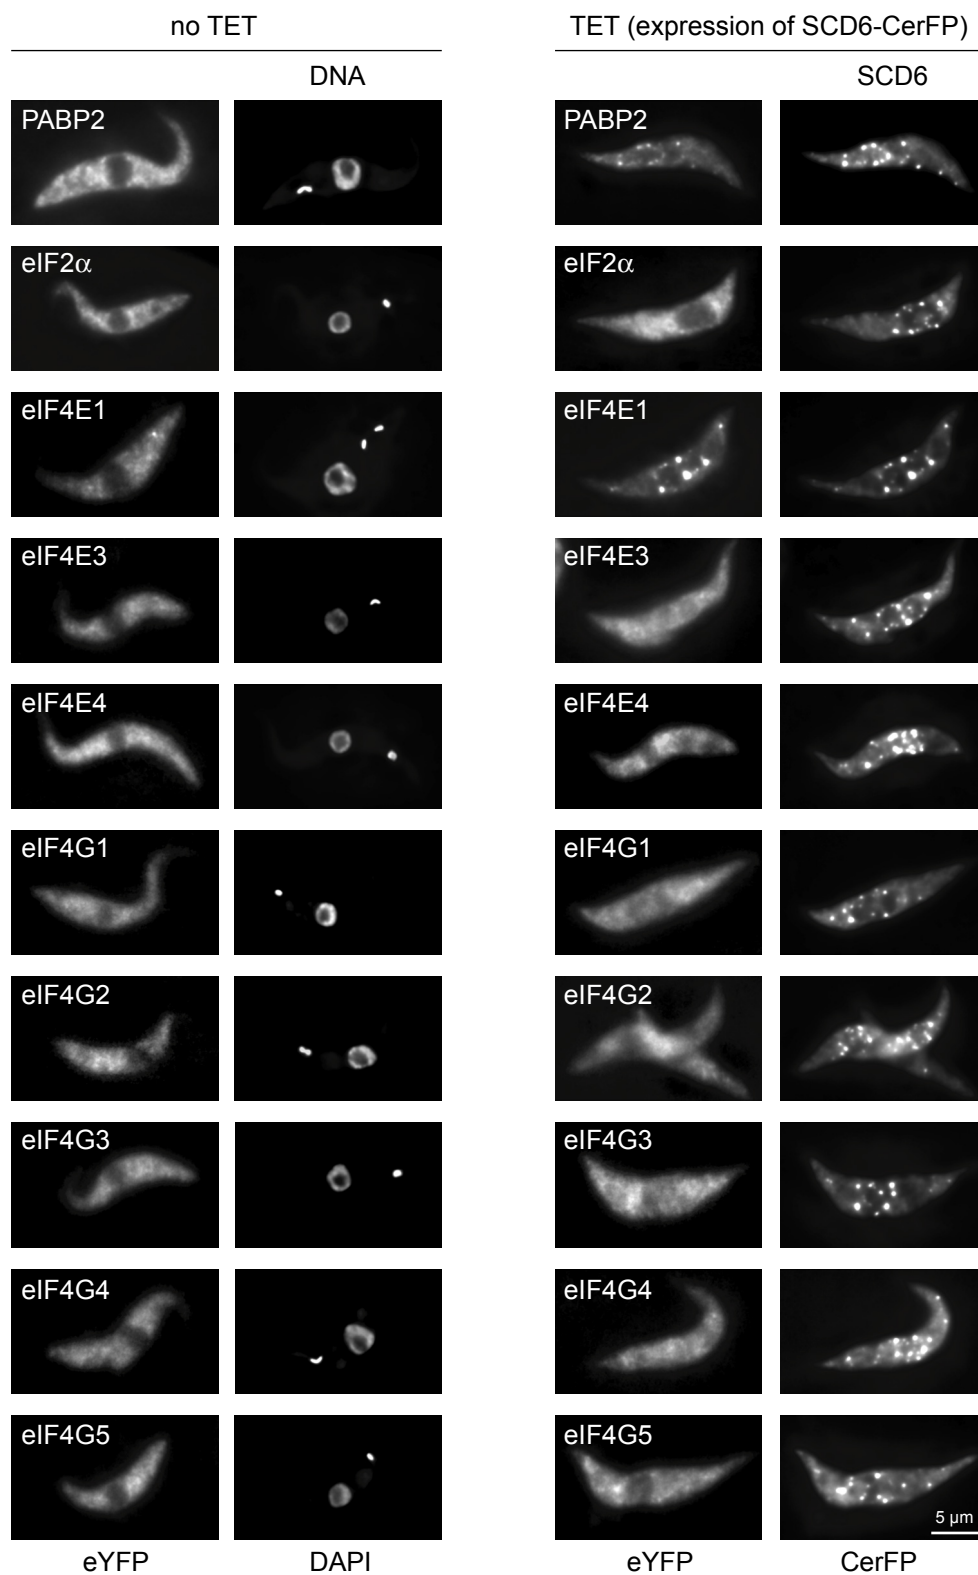

**Figure S6:** Localization of other proteins to SCD6 induced granules

Trypanosome homologues to translation initiation factors were expressed as eYFP fusion proteins from their endogenous loci in a cell line engineered to over-express SCD6-CerFP at induction with tetracyclin (TET). Fluorescent microscopy images (Z-stack projection of deconvolved Z-stacks, sum slices) are shown for cells not expressing SCD6-CerFP (no TET) and after 24 hours of induction.

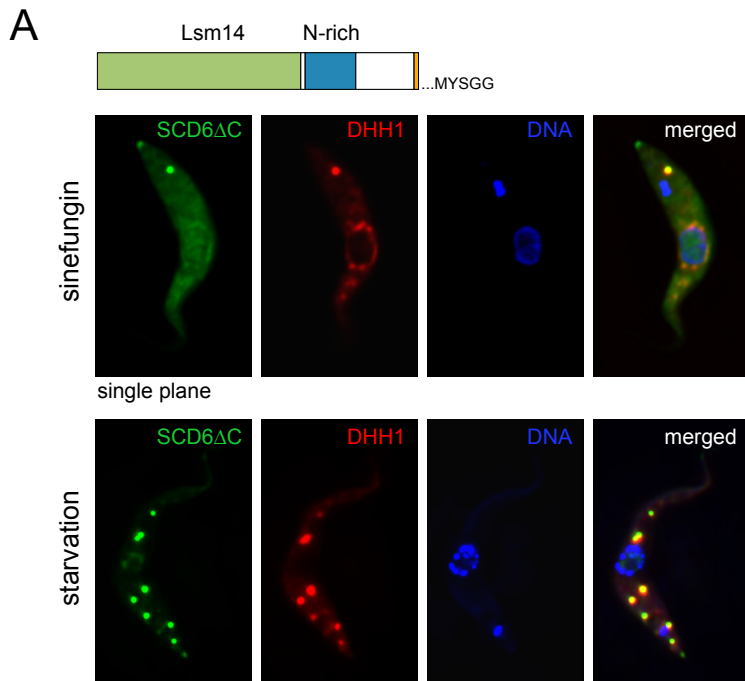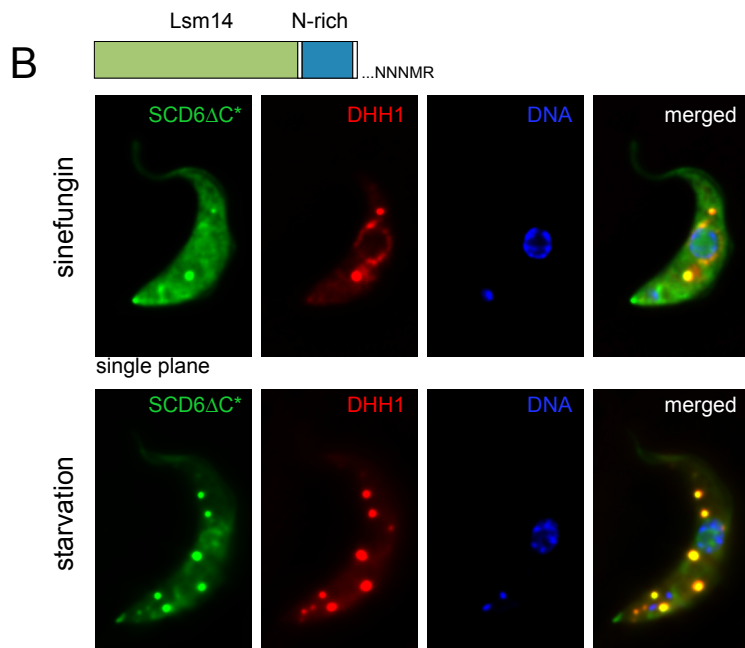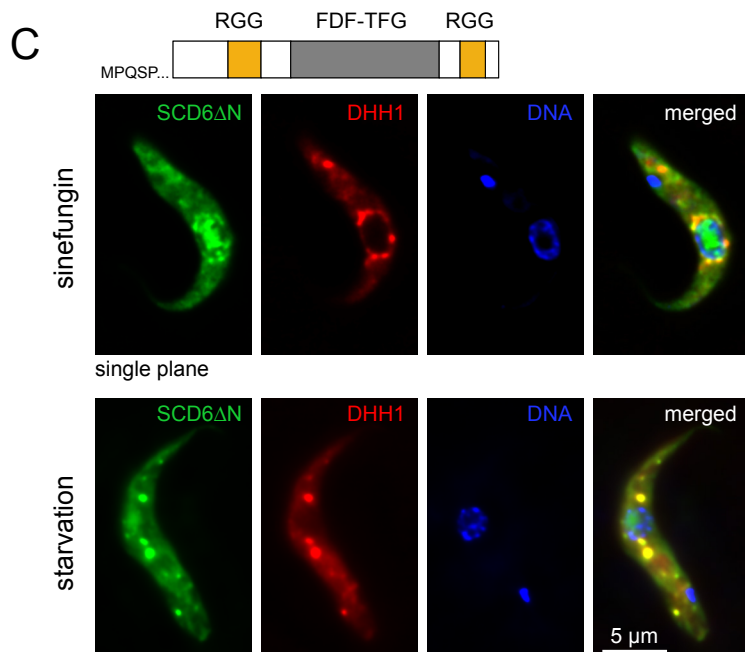

Figure S7

**Figure S7:**

Cells expressing a C-terminally or N-terminally truncated SCD6 mutant as indicated for 24 hours were treated with sinefungin (60 min) or starvation (120 min PBS). Projections of deconvolved Z-stacks of one representative cell, or single plane images are shown.

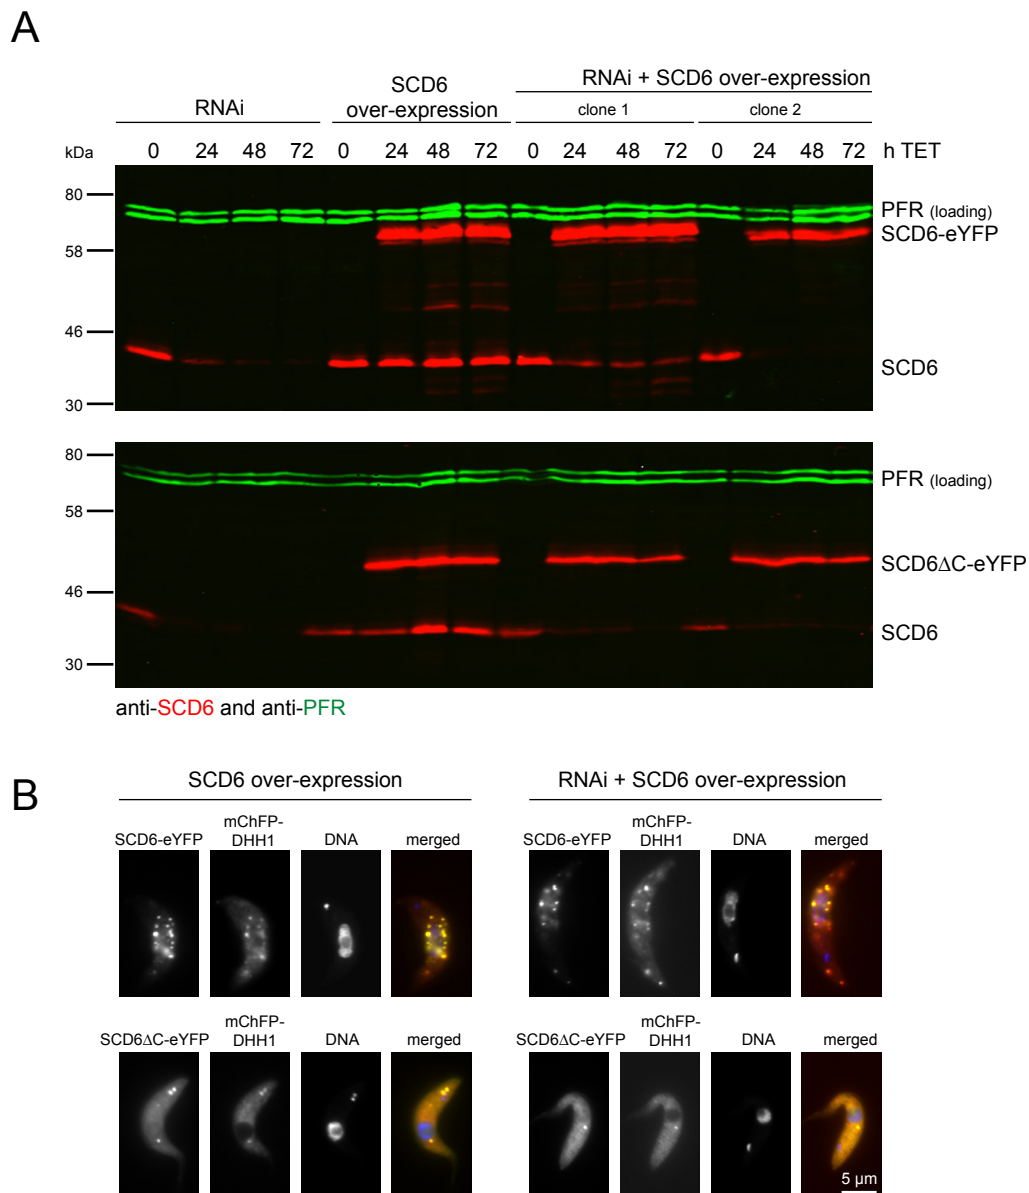

**Figure S8:** Simultaneous RNAi knock-down of SCD6 and over-expression of SCD6-eYFP or SCD6ΔC-eYFP. Procyclic trypanosome cell lines were engineered for tetracyclin induced RNAi knock-down of SCD6, tetracyclin induced over-expression of either SCD6-eYFP or SCD6ΔC-eYFP as well as both RNAi and SCD6 over-expression together. Part of the 3' UTR sequence of SCD6 was used as RNAi target; the over-expression vectors contain the modified aldolase 3' UTR (Sunter et al., 2012), and expression is therefore not affected by RNAi. (A) Western blot with cell lysates taken over a time-course of RNAi, over-expression or RNAi + over-expression probed with a polyclonal serum raised against SCD6 (Kramer et al., 2008); results from two different clones are shown. PFR served as loading control. The polyclonal SCD6 antiserum preferentially recognizes the C-terminal part of SCD6, thus, the apparent lower expression level of the SCD6ΔC-eYFP protein in comparison to the SCD6-eYFP protein is not real; when expression levels are compared using anti-GFP, expression of SCD6ΔC-eYFP is in fact higher than the expression of SCD6-eYFP (data not shown here). (B) Single plane fluorescence microscopy images of cells overexpressing SCD6-eYFP or SCD6ΔC-eYFP in the absence or presence of RNAi knock-down of the endogenous SCD6.

All images were taken using a Zeiss Axioskop microscope equipped with a Plan-Apochromat 100x/1.4 Oil DIC objective and a monochrome CCD camera AxioCam MR.

Sunter, J., Wickstead, B., Gull, K. and Carrington, M. (2012). A new generation of T7 RNA polymerase-independent inducible expression plasmids for *Trypanosoma brucei*. PLoS One 7, e35167.

Kramer, S., Queiroz, R., Ellis, L., Webb, H., Hoheisel, J. D., Clayton, C. and Carrington, M. (2008). Heat shock causes a decrease in polysomes and the appearance of stress granules in trypanosomes independently of eIF2(alpha) phosphorylation at Thr169. J Cell Sci 121, 3002-3014.



Table S1: Comprehensive list of plasmids used in this work (including supplementary figures)

| Name of plasmid                                                              | ID of the trypanosome protein | Name of protein                 | Description                                                                                                                   | Based on mother plasmid                      | Reference for mother plasmid | Selection |
|------------------------------------------------------------------------------|-------------------------------|---------------------------------|-------------------------------------------------------------------------------------------------------------------------------|----------------------------------------------|------------------------------|-----------|
| 3924                                                                         | Tb11.03.0530                  | SCD6-eYFP                       | Inducible overexpression                                                                                                      | 3888                                         | Sunter et al., 2012          | BSD       |
| 3342                                                                         | Tb09.211.2150                 | PABP2-mChFP                     | Endogenous expression                                                                                                         | 3086 (=2705 with Hygro)                      | /                            | Hygro     |
| 3925                                                                         | Tb927.10.3990                 | mChFP-DHH1                      | Endogenous expression                                                                                                         | 2679                                         | Kelly 2007                   | Puromycin |
| SK85                                                                         | Tb11.18.0004                  | eIF4E1-mChFP                    | Endogenous expression                                                                                                         | 3086 (=2705 with Hygro)                      | /                            | Hygro     |
| 2792                                                                         | Tb11.03.0530                  | SCD6-eYFP                       | Endogenous expression                                                                                                         | 2710                                         | Kelly 2007                   | NEO       |
| 2913                                                                         | Tb11.03.0530                  | $\Delta$ SCD6                   | Deletion of one SCD6 allele by replacing the ORF by BSD cassette                                                              | /                                            | /                            | BSD       |
| 3351                                                                         | Tb09.211.2150                 | PABP2-eYFP                      | Endogenous expression                                                                                                         | 3345                                         | /                            | Puro      |
| SK53                                                                         | Tb927.3.2900                  | eYFP-eIF2a                      | Endogenous expression                                                                                                         | /                                            | /                            | Puro      |
| SK54                                                                         | Tb11.18.0004                  | eIF4E1-eYFP                     | Endogenous expression                                                                                                         | 2948                                         | /                            | Hygro     |
| SK56                                                                         | Tb11.01.3630                  | eIF4E3-eYFP                     | Endogenous expression                                                                                                         | 2948                                         | /                            | Hygro     |
| SK57                                                                         | Tb927.6.1870                  | eIF4E4-eYFP                     | Endogenous expression                                                                                                         | 2948                                         | /                            | Hygro     |
| SK60                                                                         | Tb927.5.1490                  | eIF4G1-eYFP                     | Endogenous expression                                                                                                         | 2948                                         | /                            | Hygro     |
| SK62                                                                         | Tb09.160.3980                 | eIF4G2-eYFP                     | Endogenous expression                                                                                                         | 2948                                         | /                            | Hygro     |
| SK58                                                                         | Tb927.8.4820                  | eIF4G3-eYFP                     | Endogenous expression                                                                                                         | 2948                                         | /                            | Hygro     |
| SK64                                                                         | Tb11.01.2330                  | eIF4G4-eYFP                     | Endogenous expression                                                                                                         | 2948                                         | /                            | Hygro     |
| SK66                                                                         | Tb927.8.4500                  | eIF4G5-eYFP                     | Endogenous expression                                                                                                         | 2948                                         | /                            | Hygro     |
| SK69                                                                         | Tb09.211.2150                 | SCD6-CerFP                      | Inducible overexpression                                                                                                      | 4256 (=3927 with CerFP)                      | Sunter et al., 2012          | BSD       |
| 4209, 4191, 4009, SK29, SK23, SK27, SK25, 4260, 4175, 4007, 4008, 4176, 4010 | Tb11.03.0530                  | SCD6 $\Delta$ and $\Delta$ SCD6 | Inducible overexpression of SCD6 truncations (see Figure 6 for details; plasmid numbers are in the same order as in Figure 6) | 3888                                         | Sunter et al., 2012          | BSD       |
| 4296                                                                         | Tb11.03.0530                  | SCD6-2NLS-eYFP                  | Inducible overexpression                                                                                                      | 4259 (=3888 with 2 NLS)                      | /                            | BSD       |
| 4297                                                                         | Tb11.03.0530                  | SCD6 $\Delta$ C-2NLS-eYFP       | Inducible overexpression                                                                                                      | 4259 (=3888 with 2 NLS)                      | /                            | BSD       |
| SK91                                                                         | Tb11.18.0004                  | eIF4E1-NLS-CerFP                | Inducible overexpression                                                                                                      | SK89 (=4256 (=3927 with CerFP) with one NLS) | /                            | Puro      |
| 4286                                                                         | Tb11.03.0530                  | SCD6 RNAi                       | RNAi, targeting the 3' UTR of SCD6                                                                                            | 3666                                         | Sunter et al., 2012          | BSD       |
| 4287                                                                         | Tb11.03.0530                  | SCD6-eYFP                       | Inducible overexpression                                                                                                      | 4275 (=Hygro in 3888)                        | /                            | Hygro     |
| SK122                                                                        |                               | eYFP                            | Inducible overexpression                                                                                                      | 3383                                         | Sunter et al., 2012          | BSD       |
| SK123                                                                        | Tb11.03.0530                  | SCD6                            | Inducible overexpression                                                                                                      | 3383                                         | Sunter et al., 2012          | BSD       |
